# Supplementary material for: Influences of surface coating of PLGA nanoparticles on immune activation of macrophages
Source: Royal Society of Chemistry journal article supplement (doi:10.1039/c7tb03080k), 2018-01-01
Supplement: c7tb03080k1.pdf [file c7tb03080k1.pdf]

## Supplementary Materials

### Influences of Surface Coating of PLGA Nanoparticles on Immune Activation of Macrophages

Xinyi Chen<sup>1</sup> and Changyou Gao<sup>1,2\*</sup>

*1. MOE Key Laboratory of Macromolecular Synthesis and Functionalization, Department of Polymer*

*Science and Engineering, Zhejiang University, Hangzhou 310027, China*

*<sup>2</sup> Dr. Li Dak Sum & Yip Yio Chin Center for Stem Cell and Regenerative Medicine, Zhejiang University,*

*Hangzhou 310058, China*

*\*E-mail address: cygao@mail.hz.zj.cn*

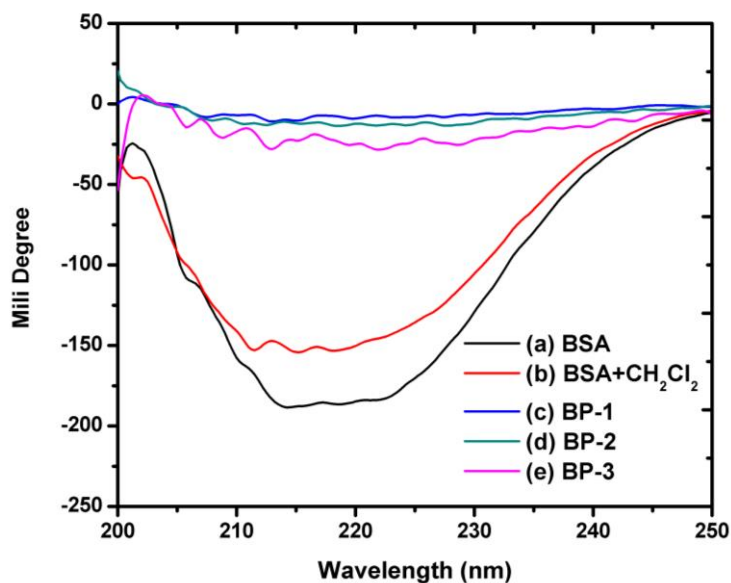

**Figure S1** CD spectra of (a) BSA solution (30 mg/mL), (b) BSA solution (30 mg/mL) treated with  $\text{CH}_2\text{Cl}_2$ , and (c-e) 3 kinds of BSA/PLGA NPs (1 mg PLGA/mL).

The secondary protein structure of BSA on BSA/PLGA NPs was detected by circular dichroism spectroscopy (CD, JASCO-820, Japan). All the BSA/PLGA NPs stock solutions were diluted by PBS to form 1 mg/mL solutions for the measurement at 25 °C, respectively. As a comparison, BSA solution and BSA solution treated with  $\text{CH}_2\text{Cl}_2$  were measured similarly.

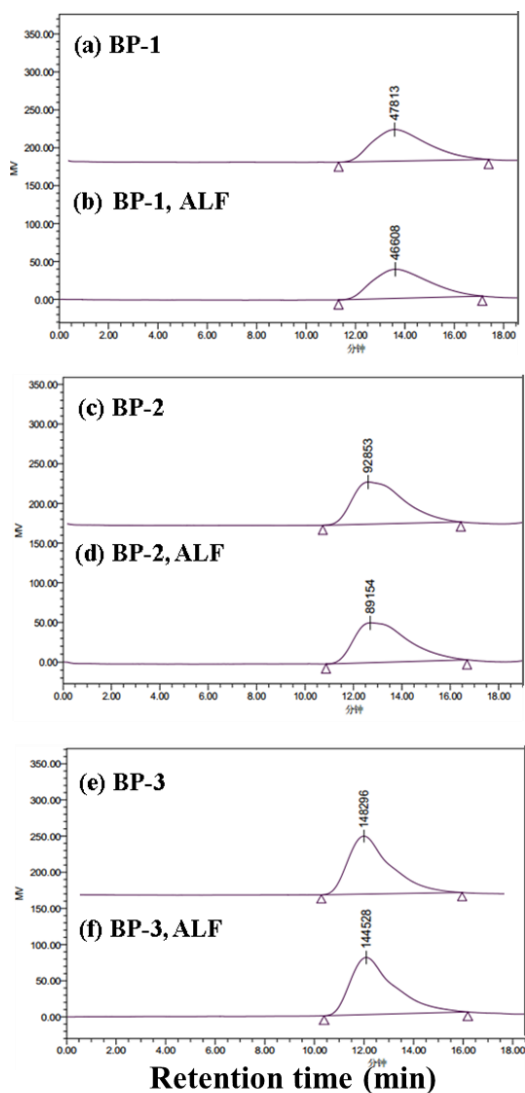

**Figure S2** GPC curves of BSA/PLGA NPs before and after being incubated in ALF 4.5 for 7 days *in vitro*. The concentration of NPs was 100  $\mu\text{g/mL}$ .

The degradation behavior of BSA/PLGA NPs being co-incubated with artificial lysosomal fluid (ALF) or RAW264.7 cells was evaluated by measuring the molecular weights of BSA/PLGA NPs by gel permeation chromatography (GPC, Waters 515, Water, USA). The artificial lysosomal fluid with a pH value of 4.5 (ALF 4.5) was prepared according to Midander's work [1].

The 3 kinds of BSA/PLGA NPs with different molecular weights were collected and re-suspended in the ALF solution with a concentration of 1  $\text{mg/mL}$ . The mixtures were shaken in a thermostatic water bath at 37  $^{\circ}\text{C}$  for 7 days. All the NPs were then collected and vacuum dried, and dissolved in

anhydrous tetrahydrofuran (THF) for GPC determination. Moreover, RAW264.7 cells were seeded into a large culture flask at a density of  $5 \times 10^5$  cells/well and maintained for 12 h till adherence. Then the medium was replaced with fresh one containing 100  $\mu\text{L}/\text{mL}$  BSA/PLGA NPs, respectively. After co-incubated for another 7 days, the BSA/PLGA NPs were collected and vacuum dried, and dissolved in anhydrous THF for GPC determination. The molecular weights of BSA/PLGA NPs before and after being incubated in ALF 4.5 were displayed in Figure S2, showing that they were not altered significantly. The NPs co-incubated with cells had a similar result.

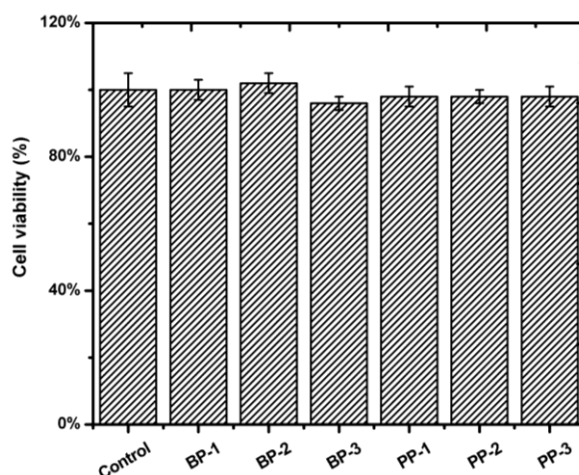

**Figure S3** Cytoviability of RAW264.7 macrophages after being incubated with PLGA NPs for 24 h.

The concentration of NPs was 100  $\mu\text{g}/\text{mL}$ .

MTT (3-(4,5-dimethyl-thiazol-2-yl)-2,5-diphenyltetrazolium bromide) is a compound that can form specific dark blue formazan crystals in the presence of metabolically active mitochondria. Thus the cytoviability was estimated by using MTT assay.

Firstly, RAW264.7 cells were plated at a density of  $1 \times 10^4$  cells/well in a 96-well plate and cultured for 12 h till adherence. The medium was replaced with fresh one containing 100  $\mu\text{L}/\text{mL}$  PLGA NPs, respectively. After being co-incubated for another 24 h, the medium was replaced with

100  $\mu$ L fresh one containing 0.5 mg/mL MTT. After another 4 h culture at 37 °C, the dark blue formazan crystals were dissolved by dimethyl sulfoxide (DMSO), whose absorbance (i.e. the optical density (O.D.)) was measured at 562 nm by a microplate reader. Then all the O.D. values were normalized to that of the particle-free cell control (Figure S3).

Phenotypes of RAW264.7 cells were studied via immunofluorescent staining at the very beginning to ensure that the cells are not polarized and remain to be mononuclear macrophage. Generally, CD68 and CCR7 are considered to be the main specific antibody molecules for  $M_0$  cells and  $M_1$  cells, respectively [2-3]. After incubated with FITC-CD68/PBS or PE-CCR7/PBS antibody working solutions, the RAW264.7 cells were detached and re-suspended in PBS. The average inflorescence intensity of cells was then determined by flow cytometry (FACS Calibur, Becton Dickinson, USA) (Table S1).

Table S1 The flow cytometry results of immunofluorescence staining

|                | CD68 staining |              | CCR7 staining |              |
|----------------|---------------|--------------|---------------|--------------|
|                | Negative (%)  | Positive (%) | Negative (%)  | Positive (%) |
| RAW264.7 cells | 94.9          | 5.1          | 97.7          | 2.3          |

The specific antibody binding experiments reveal that very small percentages of cells were stained positive, suggesting that the RAW264.7 cells used in this study remain to be mononuclear macrophages rather than transferring to  $M_0$  cells or  $M_1$  cells. Thus the phenotype difference of RAW264.7 cells is not considered as a factor influencing the uptake capacity of PLGA NPs.

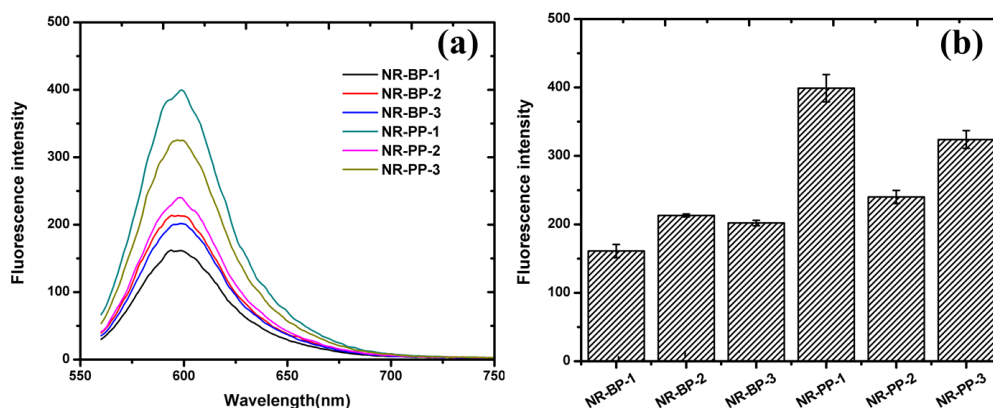

**Figure S4** Fluorescence intensity of the 6 kinds of PLGA NPs. (a) The emission spectra of Nile red-labeled PLGA NPs under an excitation wavelength of 543 nm, and (b) the relative fluorescence intensity at an emission wavelength of 598 nm.

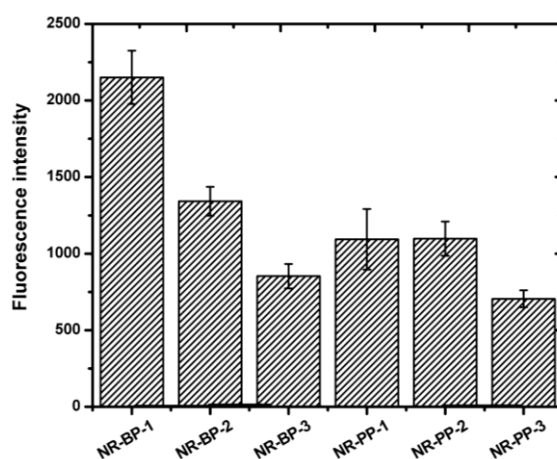

**Figure S5** Fluorescence intensity of cells being incubated with 100 µg/mL PLGA NPs for 24 h.

The data were obtained by flow cytometry.

To monitor the cellular uptake of the PLGA NPs by flow cytometry and to visualize the intracellular NPs distribution by confocal laser scanning microscopy (CLSM, LSM510, Zeiss, Germany), minor amount of Nile red was loaded into the BSA/PLGA and PEI/PLGA NPs.

Firstly, the fluorescent intensity of each kind of PLGA NPs was determined by fluorescent spectroscopy (LS55, Perkin Elmer, USA) (Figure S4a). The sample preparation procedure was as follows. A known weight of each kind of NR-PLGA NPs was dissolved in dichloromethane to form a

homogeneous solution, and then the fluorescent intensity was measured at an emission wavelength of 543 nm. The fluorescence intensity at the emission wavelength of 598 nm was quantitatively compared in Figure S4b.

Secondly, the average fluorescence intensity of RAW264.7 cells after being co-incubated with Nile red-labeled PLGA NPs for 24 h was determined by flow cytometry (Figure S5). The raw data obtained by flow cytometry were further normalized according to the unit fluorescence intensity of each Nile red-labeled PLGA NPs. In this way, the internalized amount of PLGA NPs can be quantitatively compared with each other.

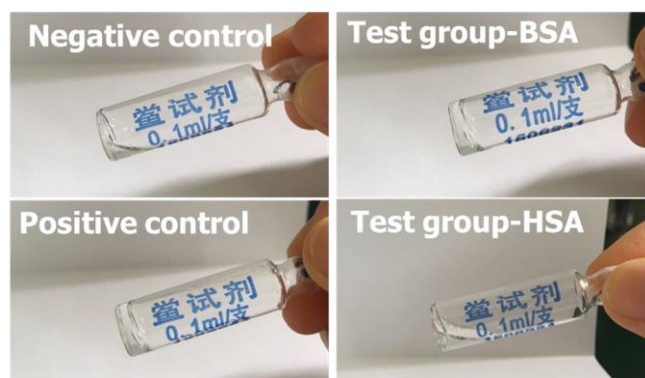

**Figure S6** Qualitative detection of bacterial endotoxin via Gel Clot LAL Assay. The concentration of BSA and HSA solutions was 10 mg/mL.

To acquire an endotoxin test with a detection limit of 0.25 EU endotoxin, a standard endotoxin solution with a concentration of 0.25 EU was prepared. All the standard group and test groups were preceded according to the standard procedure by incubating the test tubes at 37 °C for 1 h without disturbance. Figure S6 shows that a solid gel was formed for both the BSA test sample and the 0.25 EU standard endotoxin solution (i.e. positive control), whereas no gel was formed for the HSA test sample and the pyrogen-free diluting water (i.e. negative control).

## Reference

- [1]. Midander K, De Frutos A, Hedberg Y, et al. Bioaccessibility studies of ferro-chromium alloy particles for a simulated inhalation scenario: A comparative study with the pure metals and stainless steel [J]. *Integrated Environmental Assessment and Management*, 2009, 6(3): 441-455.
- [2]. Spiller KL, Anfang RR, et al. The role of macrophage phenotype in vascularization of tissue engineering scaffolds [J]. *Biomaterials*. 2014; 35:4477-88.
- [3]. Su L, Zhang W, Wu X, et al. Glycocalyx-Mimicking Nanoparticles for Stimulation and Polarization of Macrophages via Specific Interactions [J]. *Small*, 2015, 11(33): 4191-4200.
